# Supplementary material
Source: MDPI journal article supplement (https://www.mdpi.com/2306-5338/5/1/3)
Supplement: s1 [file s1]

# Cross-validation plots and kriging model configuration

## $\delta^2\text{H}$ model

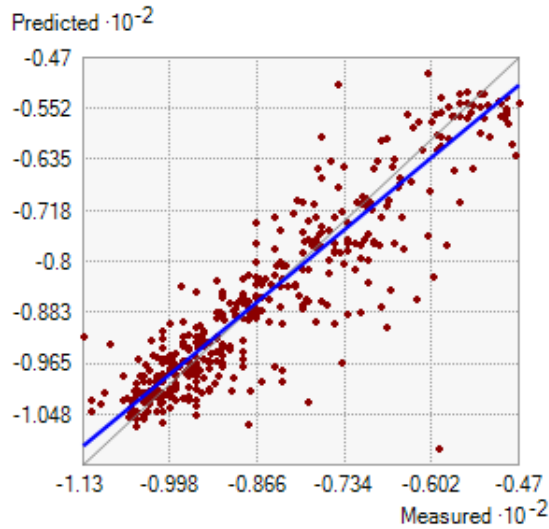

Graph 1.  $\delta^2\text{H}$  cross-validation plot [‰VSMOW]

| Method                             | Kriging                        |
|------------------------------------|--------------------------------|
| Type                               | Simple                         |
| Output type                        | Prediction                     |
| Dataset #                          | 1                              |
| Trend type                         | Third                          |
| Transformation                     | Normal Score Transformation    |
| Approximation                      | DensitySkew                    |
| Kernels                            | 7                              |
| BaseDistribution                   | Student's t-distribution       |
| Trend removal                      | Local Polynomial Interpolation |
| Power                              | 3                              |
| Bandwidth                          | 18,211.24523409215             |
| Kernel function                    | Exponential                    |
| Output type                        | Prediction                     |
| Spatial condition number threshold | 418.034384916221               |
| Exploratory trend surface analysis | 18                             |
| Searching neighborhood             | Standard                       |
| Neighbors to include               | 1,000                          |
| Sector type                        | Full                           |
| Major semiaxis                     | 59,965.62707511661             |
| Minor semiaxis                     | 59,965.62707511661             |
| Angle                              | 0                              |
| Searching neighborhood             | Standard                       |
| Neighbors to include               | 5                              |
| Include at least                   | 2                              |
| Sector type                        | Four and 45 degree             |
| Major semiaxis                     | 1,829.525782924125             |
| Minor semiaxis                     | 1,829.525782924125             |
| Angle                              | 0                              |
| Variogram                          | Covariance                     |
| Number of lags                     | 12                             |
| Lag size                           | 119.429466699781               |
| Nugget                             | 0.429649694525                 |
| Measurement error %                | 100                            |
| Model type                         | Stable                         |
| Parameter                          | 0.4390625                      |
| Range                              | 955.435733598245               |
| Anisotropy                         | No                             |
| Partial sill                       | 0.647903909886                 |

List 1.  $\delta^2\text{H}$  model configuration

## $\delta^{18}\text{O}$ model

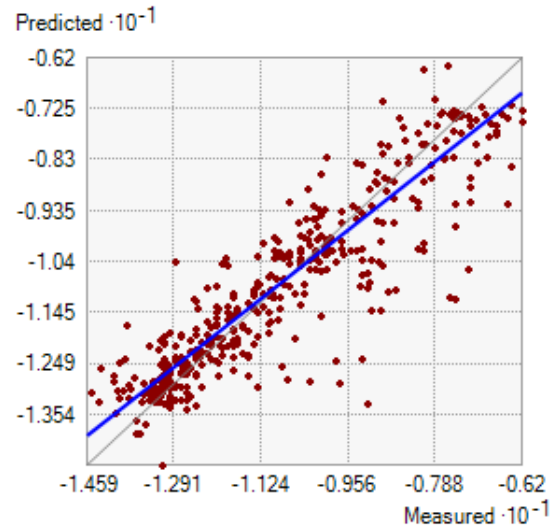

Graph 2.  $\delta^{18}\text{O}$  cross-validation plot [‰VSMOW]

| Method                             | Kriging                        |
|------------------------------------|--------------------------------|
| Type                               | Simple                         |
| Output type                        | Prediction                     |
| Dataset #                          | 1                              |
| Trend type                         | Third                          |
| Transformation                     | Normal Score Transformation    |
| Approximation                      | DensitySkew                    |
| Kernels                            | 8                              |
| BaseDistribution                   | Empirical                      |
| Trend removal                      | Local Polynomial Interpolation |
| Power                              | 3                              |
| Bandwidth                          | 19,468.88144895175             |
| Kernel function                    | Exponential                    |
| Output type                        | Prediction                     |
| Spatial condition number threshold | 615.097900112207               |
| Exploratory trend surface analysis | 20                             |
| Searching neighborhood             | Standard                       |
| Neighbors to include               | 1,000                          |
| Sector type                        | Full                           |
| Major semiaxis                     | 59,083.06387348751             |
| Minor semiaxis                     | 59,083.06387348751             |
| Angle                              | 0                              |
| Searching neighborhood             | Standard                       |
| Neighbors to include               | 5                              |
| Include at least                   | 2                              |
| Sector type                        | Four and 45 degree             |
| Major semiaxis                     | 1,829.525782924125             |
| Minor semiaxis                     | 1,829.525782924125             |
| Angle                              | 0                              |
| Variogram                          | Covariance                     |
| Number of lags                     | 12                             |
| Lag size                           | 108.503842755599               |
| Nugget                             | 0.442866230173                 |
| Measurement error %                | 87.4909957267                  |
| Model type                         | Stable                         |
| Parameter                          | 0.2                            |
| Range                              | 868.030742044796               |
| Anisotropy                         | No                             |
| Partial sill                       | 0.592864036064                 |

List 2.  $\delta^{18}\text{O}$  model configuration
